# Supplementary material for: Expert Consensus Survey on Digital Health Tools for Patients With Serious Mental Illness: Optimizing for User Characteristics and User Support
Source: PubMed Central journal article supplement (PMC6019847; doi:10.2196/mental.9777), 2018-06-12
Supplement: mental_v5i2e46_app2.pdf [file mental_v5i2e46_app2.pdf]

Question 1. Characteristics of PATIENTS that affect ability to engage with and use a digital health tool How much do you believe the following patient characteristics affect the chances that a patient can successfully engage with and use a digital health tool? In answering this and subsequent questions, please consider the type of digital health tool(s) with which you have the most experience.  
Please rate each item on a scale from 1 to 9 with: 1 = likely to make it very difficult for person to engage with and use 5 = not likely to influence ability to engage with or use much one way or another 9 = extremely likely to promote engagement and ability to use.

1a. Patient Characteristics

|                                                                                                                             | N  | "1" | "2" | "3" | "4" | "5" | "6" | "7" | "8" | "9" | Avg | SD  | Chc | 1st | 2nd | 3rd | CI_lo | CI_hi | Rank | Consensus |
|-----------------------------------------------------------------------------------------------------------------------------|----|-----|-----|-----|-----|-----|-----|-----|-----|-----|-----|-----|-----|-----|-----|-----|-------|-------|------|-----------|
| Interest in using state-of-the-art technology                                                                               | 39 | 1   | 0   | 0   | 0   | 0   | 3   | 7   | 7   | 21  | 8.0 | 1.5 | 54% | 90% | 8%  | 3%  | 7.5   | 8.5   | Chc  | Yes       |
| Resources that facilitate access to treatment (availability of Wi-Fi or data plan, applicable hardware, insurance coverage) | 40 | 0   | 0   | 0   | 0   | 1   | 2   | 11  | 16  | 10  | 7.8 | 1.0 | 25% | 93% | 8%  | 0%  | 7.5   | 8.1   | 1st  | Yes       |
| Positive expectations on the part of the patient about using a digital health tool                                          | 40 | 0   | 0   | 0   | 0   | 1   | 3   | 11  | 14  | 11  | 7.8 | 1.0 | 28% | 90% | 10% | 0%  | 7.5   | 8.1   | 1st  | Yes       |
| Owns and uses a smart phone/computer/tablet                                                                                 | 40 | 0   | 0   | 0   | 0   | 0   | 4   | 11  | 16  | 9   | 7.8 | 0.9 | 23% | 90% | 10% | 0%  | 7.5   | 8.0   | 1st  | Yes       |
| Positive social support (i.e., patient has an involved significant other or caregiver)                                      | 40 | 0   | 0   | 0   | 0   | 1   | 3   | 21  | 11  | 4   | 7.4 | 0.9 | 10% | 90% | 10% | 0%  | 7.1   | 7.6   | 1st  | Yes       |
| < 18 years old                                                                                                              | 40 | 0   | 0   | 2   | 2   | 3   | 2   | 10  | 8   | 13  | 7.3 | 1.8 | 33% | 78% | 18% | 5%  | 6.8   | 7.8   | 1st  | Yes       |
| 18-44 years old                                                                                                             | 40 | 0   | 0   | 0   | 0   | 4   | 7   | 11  | 11  | 7   | 7.3 | 1.2 | 18% | 73% | 28% | 0%  | 6.9   | 7.6   | 1st  | Yes       |
| Bachelor's degree or more education                                                                                         | 40 | 0   | 0   | 0   | 0   | 3   | 9   | 16  | 10  | 2   | 7.0 | 1.0 | 5%  | 70% | 30% | 0%  | 6.7   | 7.3   | 1st  | Yes       |
| High school or more education                                                                                               | 40 | 0   | 0   | 1   | 1   | 10  | 11  | 14  | 3   | 0   | 6.1 | 1.1 | 0%  | 43% | 55% | 3%  | 5.8   | 6.5   | 2nd  | Yes       |
| Female gender                                                                                                               | 40 | 0   | 0   | 0   | 0   | 28  | 3   | 6   | 2   | 1   | 5.6 | 1.1 | 3%  | 23% | 78% | 0%  | 5.3   | 6.0   | 2nd  | Yes       |
| 45-64 years old                                                                                                             | 40 | 0   | 0   | 1   | 6   | 14  | 8   | 10  | 1   | 0   | 5.6 | 1.2 | 0%  | 28% | 70% | 3%  | 5.2   | 5.9   | 2nd  | Yes       |
| Currently married                                                                                                           | 40 | 0   | 0   | 0   | 0   | 27  | 7   | 4   | 2   | 0   | 5.5 | 0.9 | 0%  | 15% | 85% | 0%  | 5.3   | 5.8   | 2nd  | Yes       |
| Male gender                                                                                                                 | 40 | 0   | 0   | 2   | 1   | 25  | 3   | 7   | 1   | 1   | 5.5 | 1.2 | 3%  | 23% | 73% | 5%  | 5.1   | 5.8   | 2nd  | Yes       |
| Minority status                                                                                                             | 40 | 0   | 1   | 3   | 5   | 26  | 3   | 2   | 0   | 0   | 4.8 | 1.0 | 0%  | 5%  | 85% | 10% | 4.5   | 5.1   | 2nd  | Yes       |
| Low socioeconomic status                                                                                                    | 40 | 2   | 0   | 12  | 14  | 10  | 0   | 2   | 0   | 0   | 4.0 | 1.2 | 0%  | 5%  | 60% | 35% | 3.6   | 4.3   | 2nd  | Yes       |
| Did not complete high school                                                                                                | 40 | 1   | 2   | 12  | 15  | 9   | 1   | 0   | 0   | 0   | 3.8 | 1.0 | 0%  | 0%  | 63% | 38% | 3.5   | 4.1   | 3rd  | Yes       |
| 65+ years old                                                                                                               | 40 | 1   | 8   | 12  | 7   | 6   | 4   | 2   | 0   | 0   | 3.7 | 1.5 | 0%  | 5%  | 43% | 53% | 3.3   | 4.2   | 3rd  | Yes       |
| Low health literacy                                                                                                         | 40 | 1   | 7   | 15  | 8   | 9   | 0   | 0   | 0   | 0   | 3.4 | 1.1 | 0%  | 0%  | 43% | 58% | 3.1   | 3.8   | 3rd  | Yes       |
| Severe psychosocial stressors (e.g., poverty, general medical problems, abusive relationship, legal problems)               | 40 | 4   | 12  | 13  | 8   | 2   | 1   | 0   | 0   | 0   | 2.9 | 1.2 | 0%  | 0%  | 28% | 73% | 2.5   | 3.2   | 3rd  | Yes       |
| Low IQ                                                                                                                      | 40 | 3   | 7   | 23  | 7   | 0   | 0   | 0   | 0   | 0   | 2.9 | 0.8 | 0%  | 0%  | 18% | 83% | 2.6   | 3.1   | 3rd  | Yes       |
| None or minimal knowledge/ability/comfort using technology (e.g., computers, tablets, mobile phones)                        | 39 | 1   | 16  | 16  | 4   | 2   | 0   | 0   | 0   | 0   | 2.7 | 0.9 | 0%  | 0%  | 15% | 85% | 2.5   | 3.0   | 3rd  | Yes       |
| Low literacy (i.e., reading ability)/numeracy                                                                               | 40 | 5   | 16  | 17  | 1   | 1   | 0   | 0   | 0   | 0   | 2.4 | 0.8 | 0%  | 0%  | 5%  | 95% | 2.2   | 2.7   | 3rd  | Yes       |
| Low motivation                                                                                                              | 40 | 10  | 16  | 12  | 2   | 0   | 0   | 0   | 0   | 0   | 2.2 | 0.9 | 0%  | 0%  | 5%  | 95% | 1.9   | 2.4   | 3rd  | Yes       |
| Serious level of chaos and disorganization in the person's life/environment                                                 | 40 | 12  | 16  | 9   | 3   | 0   | 0   | 0   | 0   | 0   | 2.1 | 0.9 | 0%  | 0%  | 8%  | 93% | 1.8   | 2.4   | 3rd  | Yes       |

1b. Disorders, Signs, and Symptoms

|                                               | <i>N</i> | "1" | "2" | "3" | "4" | "5" | "6" | "7" | "8" | "9" | <i>Avg</i> | <i>SD</i> | <i>Chc</i> | <i>1st</i> | <i>2nd</i> | <i>3rd</i> | <i>CI_lo</i> | <i>CI_hi</i> | <i>Rank</i> | <i>Consensus</i> |
|-----------------------------------------------|----------|-----|-----|-----|-----|-----|-----|-----|-----|-----|------------|-----------|------------|------------|------------|------------|--------------|--------------|-------------|------------------|
| Good occupational functioning                 | 39       | 0   | 0   | 0   | 1   | 3   | 6   | 17  | 11  | 1   | 6.9        | 1.1       | 3%         | 74%        | 26%        | 0%         | 6.6          | 7.3          | 1st         | Yes              |
| Diagnosis of bipolar disorder                 | 40       | 0   | 0   | 2   | 5   | 25  | 4   | 2   | 1   | 1   | 5.2        | 1.1       | 3%         | 10%        | 85%        | 5%         | 4.8          | 5.5          | 2nd         | Yes              |
| Diagnosis of major depressive disorder        | 40       | 0   | 0   | 4   | 6   | 23  | 2   | 3   | 1   | 1   | 5.0        | 1.3       | 3%         | 13%        | 78%        | 10%        | 4.6          | 5.4          | 2nd         | Yes              |
| Non-suicidal self-injurious behaviors         | 40       | 0   | 0   | 0   | 7   | 29  | 3   | 1   | 0   | 0   | 5.0        | 0.6       | 0%         | 3%         | 98%        | 0%         | 4.8          | 5.1          | 2nd         | Yes              |
| Suicidal ideation                             | 40       | 0   | 3   | 4   | 3   | 26  | 3   | 0   | 1   | 0   | 4.7        | 1.2       | 0%         | 3%         | 80%        | 18%        | 4.3          | 5.0          | 2nd         | Yes              |
| Multiple previous episodes                    | 40       | 1   | 1   | 3   | 7   | 25  | 3   | 0   | 0   | 0   | 4.6        | 1.0       | 0%         | 0%         | 88%        | 13%        | 4.3          | 4.9          | 2nd         | Yes              |
| Diagnosis of schizophrenia                    | 40       | 0   | 3   | 5   | 7   | 20  | 3   | 2   | 0   | 0   | 4.5        | 1.2       | 0%         | 5%         | 75%        | 20%        | 4.2          | 4.9          | 2nd         | Yes              |
| Longer duration of illness                    | 40       | 0   | 4   | 5   | 9   | 15  | 5   | 2   | 0   | 0   | 4.5        | 1.3       | 0%         | 5%         | 73%        | 23%        | 4.0          | 4.9          | 2nd         | Yes              |
| Sensitivity to overstimulation                | 40       | 0   | 4   | 8   | 10  | 16  | 0   | 1   | 1   | 0   | 4.2        | 1.3       | 0%         | 5%         | 65%        | 30%        | 3.8          | 4.6          | 2nd         | Yes              |
| Presence of Axis II comorbidity               | 40       | 1   | 3   | 6   | 10  | 20  | 0   | 0   | 0   | 0   | 4.1        | 1.1       | 0%         | 0%         | 75%        | 25%        | 3.8          | 4.5          | 2nd         | Yes              |
| Multiple comorbid Axis I disorders            | 40       | 1   | 4   | 11  | 6   | 18  | 0   | 0   | 0   | 0   | 3.9        | 1.2       | 0%         | 0%         | 60%        | 40%        | 3.5          | 4.3          | 2nd         | Yes              |
| Greater severity of delusions/paranoia        | 40       | 2   | 7   | 10  | 9   | 10  | 2   | 0   | 0   | 0   | 3.6        | 1.3       | 0%         | 0%         | 53%        | 48%        | 3.2          | 4.0          | 3rd         | Yes              |
| Aggression/agitation                          | 40       | 4   | 4   | 10  | 11  | 11  | 0   | 0   | 0   | 0   | 3.5        | 1.3       | 0%         | 0%         | 55%        | 45%        | 3.1          | 3.9          | 3rd         | Yes              |
| Acute substance use                           | 39       | 4   | 7   | 9   | 11  | 7   | 1   | 0   | 0   | 0   | 3.3        | 1.3       | 0%         | 0%         | 49%        | 51%        | 2.9          | 3.7          | 3rd         | Yes              |
| Low energy/fatigue                            | 40       | 2   | 4   | 16  | 16  | 2   | 0   | 0   | 0   | 0   | 3.3        | 0.9       | 0%         | 0%         | 45%        | 55%        | 3.0          | 3.6          | 3rd         | Yes              |
| Low frustration tolerance                     | 40       | 2   | 8   | 19  | 9   | 2   | 0   | 0   | 0   | 0   | 3.0        | 0.9       | 0%         | 0%         | 28%        | 73%        | 2.7          | 3.3          | 3rd         | Yes              |
| Greater severity of negative symptoms         | 39       | 6   | 12  | 9   | 4   | 7   | 1   | 0   | 0   | 0   | 2.9        | 1.4       | 0%         | 0%         | 31%        | 69%        | 2.5          | 3.4          | 3rd         | Yes              |
| Greater severity of disorganization symptoms  | 40       | 4   | 14  | 11  | 8   | 2   | 0   | 1   | 0   | 0   | 2.9        | 1.3       | 0%         | 3%         | 25%        | 73%        | 2.5          | 3.2          | 3rd         | Yes              |
| Greater severity of neurocognitive impairment | 40       | 6   | 12  | 11  | 8   | 2   | 1   | 0   | 0   | 0   | 2.8        | 1.2       | 0%         | 0%         | 28%        | 73%        | 2.4          | 3.2          | 3rd         | Yes              |

1c. Appraisals and Patient Experience

|                                                                                                    | <i>N</i> | "1" | "2" | "3" | "4" | "5" | "6" | "7" | "8" | "9" | <i>Avg</i> | <i>SD</i> | <i>Chc</i> | <i>1st</i> | <i>2nd</i> | <i>3rd</i> | <i>CI_lo</i> | <i>CI_hi</i> | <i>Rank</i> | <i>Consensus</i> |
|----------------------------------------------------------------------------------------------------|----------|-----|-----|-----|-----|-----|-----|-----|-----|-----|------------|-----------|------------|------------|------------|------------|--------------|--------------|-------------|------------------|
| Perception of digital treatment as beneficial                                                      | 39       | 0   | 0   | 0   | 0   | 0   | 0   | 7   | 19  | 13  | 8.2        | 0.7       | 33%        | 100%       | 0%         | 0%         | 7.9          | 8.4          | 1st         | Yes              |
| Agreement with tasks and goals of digital treatment                                                | 40       | 0   | 0   | 0   | 0   | 0   | 1   | 12  | 16  | 11  | 7.9        | 0.8       | 28%        | 98%        | 3%         | 0%         | 7.7          | 8.2          | 1st         | Yes              |
| Self-efficacy beliefs about being able to use/operate the device                                   | 40       | 0   | 0   | 0   | 0   | 0   | 4   | 8   | 17  | 11  | 7.9        | 0.9       | 28%        | 90%        | 10%        | 0%         | 7.6          | 8.2          | 1st         | Yes              |
| Positive bond with healthcare professional (good therapeutic alliance)                             | 40       | 0   | 0   | 0   | 0   | 0   | 4   | 12  | 17  | 7   | 7.7        | 0.9       | 18%        | 90%        | 10%        | 0%         | 7.4          | 8.0          | 1st         | Yes              |
| Willingness to complete tasks/homework between treatment sessions                                  | 39       | 0   | 0   | 0   | 0   | 0   | 4   | 12  | 16  | 7   | 7.7        | 0.9       | 18%        | 90%        | 10%        | 0%         | 7.4          | 7.9          | 1st         | Yes              |
| History of good adherence to medication and other treatment                                        | 40       | 0   | 0   | 0   | 0   | 0   | 6   | 17  | 11  | 6   | 7.4        | 0.9       | 15%        | 85%        | 15%        | 0%         | 7.1          | 7.7          | 1st         | Yes              |
| Readiness to change                                                                                | 40       | 0   | 0   | 0   | 0   | 2   | 7   | 12  | 14  | 5   | 7.3        | 1.1       | 13%        | 78%        | 23%        | 0%         | 7.0          | 7.7          | 1st         | Yes              |
| Psychological mindedness                                                                           | 40       | 0   | 0   | 0   | 0   | 5   | 10  | 16  | 9   | 0   | 6.7        | 1.0       | 0%         | 63%        | 38%        | 0%         | 6.4          | 7.0          | 2nd         | Yes              |
| Engagement with mutual help organizations and/or peer support groups                               | 40       | 0   | 0   | 0   | 1   | 6   | 13  | 10  | 8   | 2   | 6.6        | 1.2       | 5%         | 50%        | 50%        | 0%         | 6.2          | 7.0          | 2nd         | Yes              |
| Stigma/discomfort/social anxiety about seeking face-to-face care for mental or behavioral problems | 40       | 1   | 0   | 3   | 1   | 9   | 12  | 10  | 2   | 2   | 5.9        | 1.6       | 5%         | 35%        | 55%        | 10%        | 5.4          | 6.4          | 2nd         | Yes              |
| Negative past experience with treatment                                                            | 40       | 4   | 3   | 12  | 11  | 7   | 3   | 0   | 0   | 0   | 3.6        | 1.4       | 0%         | 0%         | 53%        | 48%        | 3.2          | 4.0          | 3rd         | Yes              |
| Limited insight into disorder                                                                      | 40       | 3   | 8   | 12  | 8   | 8   | 1   | 0   | 0   | 0   | 3.3        | 1.3       | 0%         | 0%         | 43%        | 58%        | 2.9          | 3.7          | 3rd         | Yes              |

Question 2. Characteristics and Resources of HEALTH CARE PROFESSIONALS (HCPs) How helpful do you believe the following characteristics and resources are in enabling HCPs to successfully incorporate digital health tools in their practices?

Please rate each item on a scale from 1 to 9 with 1 = not at all helpful 5 = somewhat helpful 9 = extremely helpful

|                                                                                                                                                                     | N  | "1" | "2" | "3" | "4" | "5" | "6" | "7" | "8" | "9" | Avg | SD  | Chc | 1st  | 2nd | 3rd | CI_lo | CI_hi | Rank | Consensus |
|---------------------------------------------------------------------------------------------------------------------------------------------------------------------|----|-----|-----|-----|-----|-----|-----|-----|-----|-----|-----|-----|-----|------|-----|-----|-------|-------|------|-----------|
| HCP enthusiastic about/willing to work with patients using digital health tools                                                                                     | 40 | 0   | 0   | 0   | 0   | 0   | 0   | 2   | 16  | 22  | 8.5 | 0.6 | 55% | 100% | 0%  | 0%  | 8.3   | 8.7   | Chc  | Yes       |
| Availability of staff to support the ongoing use of the prescribed technology (e.g. make follow-up phone calls, monitor progress)                                   | 40 | 0   | 0   | 0   | 1   | 0   | 1   | 4   | 14  | 20  | 8.3 | 1.0 | 50% | 95%  | 5%  | 0%  | 7.9   | 8.6   | Chc  | Yes       |
| Availability of necessary equipment (e.g. computers, broadband internet if needed, mobile devices) for delivering patient treatment on a regular basis              | 40 | 0   | 0   | 0   | 0   | 2   | 0   | 5   | 13  | 20  | 8.2 | 1.0 | 50% | 95%  | 5%  | 0%  | 7.9   | 8.5   | Chc  | Yes       |
| Availability of staff with technology skills to teach patients how to use technology initially                                                                      | 40 | 0   | 0   | 0   | 1   | 0   | 1   | 8   | 14  | 16  | 8.1 | 1.1 | 40% | 95%  | 5%  | 0%  | 7.7   | 8.4   | 1st  | Yes       |
| Availability of necessary equipment (e.g. computers, broadband internet if needed, mobile devices) for patient use in the office for training                       | 40 | 0   | 0   | 0   | 0   | 1   | 3   | 6   | 14  | 16  | 8.0 | 1.0 | 40% | 90%  | 10% | 0%  | 7.7   | 8.4   | 1st  | Yes       |
| HCP is experienced in using computers in practice                                                                                                                   | 40 | 0   | 0   | 0   | 0   | 0   | 6   | 14  | 10  | 10  | 7.6 | 1.0 | 25% | 85%  | 15% | 0%  | 7.3   | 7.9   | 1st  | Yes       |
| HCP has familiarity with smart phone technology                                                                                                                     | 39 | 0   | 0   | 0   | 0   | 0   | 6   | 14  | 9   | 10  | 7.6 | 1.0 | 26% | 85%  | 15% | 0%  | 7.3   | 7.9   | 1st  | Yes       |
| Availability of free trial version of tools                                                                                                                         | 40 | 0   | 0   | 0   | 1   | 0   | 4   | 12  | 18  | 5   | 7.5 | 1.0 | 13% | 88%  | 13% | 0%  | 7.2   | 7.8   | 1st  | Yes       |
| Availability of a digital health tool that is consistent with the HCP's preferred theoretical orientation (e.g., a digital CBT tool for a therapist trained in CBT) | 40 | 0   | 0   | 0   | 1   | 2   | 5   | 8   | 17  | 7   | 7.5 | 1.2 | 18% | 80%  | 20% | 0%  | 7.1   | 7.9   | 1st  | Yes       |
| Availability of 24/7 call center to provide technical support for HCP and patients                                                                                  | 40 | 0   | 0   | 1   | 1   | 3   | 3   | 9   | 14  | 9   | 7.4 | 1.5 | 23% | 80%  | 18% | 3%  | 6.9   | 7.9   | 1st  | Yes       |
| HCP is ≤ 40 years old                                                                                                                                               | 40 | 1   | 1   | 1   | 1   | 7   | 6   | 14  | 5   | 4   | 6.4 | 1.8 | 10% | 58%  | 35% | 8%  | 5.8   | 6.9   | 2nd  | Yes       |

Question 4. Potential benefits of using a digital health tool for PATIENTS. Assume the items below have been demonstrated to be benefits of using a digital health tool for patients with psychiatric disorders. For each, please rate how likely you believe it would be to motivate a patient to use the digital health tool.

Please rate each item on a scale from 1 to 9 with 1 = not at all likely to motivate patient 5 = somewhat likely to motivate patient 9 = extremely likely to motivate patient

|                                                                                                                                      | N  | "1" | "2" | "3" | "4" | "5" | "6" | "7" | "8" | "9" | Avg | SD  | Chc | 1st | 2nd | 3rd | CI_lo | CI_hi | Rank | Consensus |
|--------------------------------------------------------------------------------------------------------------------------------------|----|-----|-----|-----|-----|-----|-----|-----|-----|-----|-----|-----|-----|-----|-----|-----|-------|-------|------|-----------|
| Improved functioning (e.g., social and work functioning)                                                                             | 40 | 0   | 1   | 0   | 0   | 0   | 2   | 8   | 14  | 15  | 7.9 | 1.3 | 38% | 93% | 5%  | 3%  | 7.5   | 8.3   | 1st  | Yes       |
| Reduced symptomatology                                                                                                               | 40 | 0   | 0   | 0   | 1   | 0   | 6   | 4   | 17  | 12  | 7.8 | 1.2 | 30% | 83% | 18% | 0%  | 7.4   | 8.2   | 1st  | Yes       |
| Receiving feedback/support from clinicians via the digital health system between face-to-face sessions                               | 39 | 0   | 0   | 0   | 0   | 2   | 4   | 9   | 16  | 8   | 7.6 | 1.1 | 21% | 85% | 15% | 0%  | 7.3   | 8.0   | 1st  | Yes       |
| Ability to engage with HCP periodically after discharge from face-to-face sessions                                                   | 40 | 0   | 0   | 0   | 0   | 2   | 7   | 6   | 18  | 7   | 7.5 | 1.1 | 18% | 78% | 23% | 0%  | 7.2   | 7.9   | 1st  | Yes       |
| Increased interaction with treatment team via digital health device in geographic areas where face-to-face access to HCPs is limited | 40 | 0   | 1   | 0   | 0   | 2   | 6   | 10  | 11  | 10  | 7.4 | 1.5 | 25% | 78% | 20% | 3%  | 6.9   | 7.9   | 1st  | Yes       |
| Increased confidence/self-efficacy and hope related to his or her health care                                                        | 40 | 0   | 0   | 1   | 0   | 0   | 9   | 12  | 9   | 9   | 7.4 | 1.3 | 23% | 75% | 23% | 3%  | 6.9   | 7.8   | 1st  | Yes       |
| Reduction in number of hospitalizations                                                                                              | 38 | 1   | 1   | 1   | 0   | 3   | 3   | 12  | 7   | 10  | 7.1 | 1.9 | 26% | 76% | 16% | 8%  | 6.5   | 7.7   | 2nd  | Yes       |
| Elimination or reduction of problems with transportation to treatment                                                                | 40 | 0   | 0   | 0   | 1   | 4   | 8   | 11  | 12  | 4   | 7.0 | 1.3 | 10% | 68% | 33% | 0%  | 6.6   | 7.4   | 1st  | Yes       |
| More personalized/tailored treatment approach can be offered by technology                                                           | 40 | 0   | 0   | 0   | 2   | 4   | 6   | 10  | 17  | 1   | 7.0 | 1.3 | 3%  | 70% | 30% | 0%  | 6.6   | 7.4   | 1st  | Yes       |
| Increased social engagement enabled by technology                                                                                    | 40 | 1   | 0   | 0   | 0   | 4   | 7   | 15  | 6   | 7   | 7.0 | 1.5 | 18% | 70% | 28% | 3%  | 6.5   | 7.5   | 2nd  | Yes       |
| Receiving prompt helpful automated feedback in response to input/questions                                                           | 40 | 0   | 1   | 0   | 1   | 3   | 7   | 12  | 12  | 4   | 7.0 | 1.4 | 10% | 70% | 28% | 3%  | 6.5   | 7.4   | 1st  | Yes       |
| Increased willingness to engage in care for those who are reluctant to meet face-to-face with HCPs                                   | 40 | 1   | 0   | 1   | 3   | 2   | 8   | 11  | 9   | 5   | 6.7 | 1.8 | 13% | 63% | 33% | 5%  | 6.2   | 7.2   | 2nd  | Yes       |
| Access to state-of the art treatment tools                                                                                           | 40 | 0   | 1   | 0   | 0   | 7   | 12  | 8   | 8   | 4   | 6.6 | 1.5 | 10% | 50% | 48% | 3%  | 6.2   | 7.1   | 2nd  | Yes       |
| Better self-understanding of thinking, feelings, and behaviors                                                                       | 40 | 1   | 0   | 0   | 2   | 3   | 10  | 13  | 9   | 2   | 6.6 | 1.5 | 5%  | 60% | 38% | 3%  | 6.2   | 7.1   | 2nd  | Yes       |
| Decreased stigma related to seeking mental health care                                                                               | 40 | 1   | 0   | 1   | 3   | 5   | 6   | 13  | 7   | 4   | 6.5 | 1.7 | 10% | 60% | 35% | 5%  | 6.0   | 7.0   | 2nd  | Yes       |
| Improved communication/understanding between patients and family members because of family integration in digital system             | 39 | 1   | 0   | 2   | 1   | 4   | 10  | 10  | 8   | 3   | 6.5 | 1.7 | 8%  | 54% | 38% | 8%  | 5.9   | 7.0   | 2nd  | Yes       |
| Self-management and ability to record personal information (e.g., about adherence, symptoms)                                         | 40 | 0   | 1   | 2   | 1   | 4   | 14  | 7   | 8   | 3   | 6.4 | 1.6 | 8%  | 45% | 48% | 8%  | 5.9   | 6.9   | 2nd  | Yes       |
| Around the clock access to a digital health tool that is part of the patient's treatment plan                                        | 39 | 0   | 1   | 0   | 0   | 9   | 11  | 9   | 8   | 1   | 6.4 | 1.3 | 3%  | 46% | 51% | 3%  | 6.0   | 6.8   | 2nd  | Yes       |
| Digital links to wide range of resources and support                                                                                 | 40 | 1   | 1   | 0   | 1   | 9   | 7   | 13  | 8   | 0   | 6.2 | 1.6 | 0%  | 53% | 43% | 5%  | 5.7   | 6.7   | 2nd  | Yes       |
| Increased understanding and investment in treatment plan                                                                             | 40 | 1   | 0   | 2   | 3   | 6   | 10  | 11  | 4   | 3   | 6.1 | 1.7 | 8%  | 45% | 48% | 8%  | 5.6   | 6.7   | 2nd  | Yes       |
| Ability of multiple HCPs involved in patient's care (e.g., case manager, psychologist) to access the data                            | 40 | 0   | 0   | 3   | 7   | 5   | 8   | 9   | 5   | 3   | 6.0 | 1.7 | 8%  | 43% | 50% | 8%  | 5.5   | 6.5   | 2nd  | Yes       |
| Improved patient adherence to medication and treatment plan                                                                          | 39 | 0   | 2   | 4   | 3   | 5   | 10  | 10  | 5   | 0   | 5.7 | 1.7 | 0%  | 38% | 46% | 15% | 5.2   | 6.3   | 2nd  | Yes       |
| Potential to reduce utilization of health care services and therefore cost of treatment                                              | 40 | 2   | 2   | 4   | 1   | 11  | 4   | 9   | 5   | 2   | 5.6 | 2.1 | 5%  | 40% | 40% | 20% | 4.9   | 6.2   | 2nd  | No        |
| Media representation more engaging than face-to-face interactions                                                                    | 40 | 0   | 4   | 4   | 2   | 14  | 5   | 5   | 6   | 0   | 5.3 | 1.8 | 0%  | 28% | 53% | 20% | 4.7   | 5.8   | 2nd  | Yes       |

Question 5. Potential barriers/unintended consequences when using digital health tool (e.g., mobile health application, computerized treatment tool, website). Considering average patient with serious mental illness (schizophrenia, bipolar, or major depressive disorder), how likely do you believe each of the items below is to be a potential barrier and/or to be or lead to an unintended consequence for PATIENTS using a digital health tool?

Please rate each item on a scale from 1 to 9 with 1 = significant potential to be a barrier and/or an unintended consequence 5 = some potential to be a barrier and/or an unintended consequence 9 = minimal potential to be a barrier and/or an unintended consequence

|                                                                                                                                    | N  | "1" | "2" | "3" | "4" | "5" | "6" | "7" | "8" | "9" | Avg | SD  | Chc | 1st | 2nd | 3rd | CJ_lo | CJ_hi | Rank | Consensus |
|------------------------------------------------------------------------------------------------------------------------------------|----|-----|-----|-----|-----|-----|-----|-----|-----|-----|-----|-----|-----|-----|-----|-----|-------|-------|------|-----------|
| Increase in family conflict due to information provided by the digital tool                                                        | 39 | 2   | 4   | 4   | 6   | 2   | 3   | 8   | 7   | 3   | 5.5 | 2.4 | 8%  | 46% | 28% | 26% | 4.7   | 6.2   | 2nd  | No        |
| Depersonalization of patient care and potential damage to the therapeutic relationship                                             | 40 | 4   | 3   | 7   | 3   | 3   | 6   | 8   | 3   | 3   | 5.0 | 2.5 | 8%  | 35% | 30% | 35% | 4.3   | 5.8   | 2nd  | No        |
| Patient's use of digital health tool in isolation leads to decreased face-to-face interaction with clinician and/or treatment team | 40 | 5   | 3   | 5   | 3   | 8   | 4   | 6   | 6   | 0   | 4.8 | 2.3 | 0%  | 30% | 38% | 33% | 4.1   | 5.5   | 2nd  | No        |
| Patient sets unrealistic goal and becomes discouraged                                                                              | 39 | 4   | 6   | 9   | 5   | 2   | 1   | 5   | 6   | 1   | 4.4 | 2.5 | 3%  | 31% | 21% | 49% | 3.6   | 5.2   | 2nd  | Yes       |
| Patient disappointed by not receiving prompt response from HCP                                                                     | 40 | 0   | 6   | 12  | 7   | 3   | 4   | 6   | 2   | 0   | 4.3 | 1.9 | 0%  | 20% | 35% | 45% | 3.7   | 4.9   | 2nd  | No        |
| Patient feels frustrated and discouraged with using the technology                                                                 | 40 | 10  | 6   | 9   | 3   | 3   | 3   | 3   | 2   | 1   | 3.5 | 2.3 | 3%  | 15% | 23% | 63% | 2.8   | 4.2   | 3rd  | Yes       |
| Patient has concerns about privacy                                                                                                 | 40 | 6   | 10  | 8   | 6   | 4   | 3   | 1   | 2   | 0   | 3.4 | 1.9 | 0%  | 8%  | 33% | 60% | 2.8   | 4.0   | 3rd  | Yes       |
| Patient finds the digital health tool intrusive                                                                                    | 40 | 8   | 11  | 10  | 2   | 2   | 1   | 4   | 2   | 0   | 3.2 | 2.1 | 0%  | 15% | 13% | 73% | 2.5   | 3.9   | 3rd  | Yes       |
| Patient has concerns about being monitored or policed                                                                              | 40 | 8   | 12  | 7   | 6   | 2   | 2   | 2   | 0   | 1   | 3.1 | 1.9 | 3%  | 8%  | 25% | 68% | 2.5   | 3.6   | 3rd  | Yes       |
| Patient does not understand how to use the digital health tool                                                                     | 40 | 12  | 10  | 7   | 4   | 3   | 2   | 1   | 0   | 1   | 2.8 | 1.9 | 3%  | 5%  | 23% | 73% | 2.2   | 3.4   | 3rd  | Yes       |
| Patient finds it a burden to use the digital health tool                                                                           | 40 | 12  | 12  | 9   | 2   | 2   | 0   | 1   | 1   | 1   | 2.6 | 1.9 | 3%  | 8%  | 10% | 83% | 2.0   | 3.2   | 3rd  | Yes       |
| Patient does not believe that the intervention is well suited to his/her particular problem(s).                                    | 40 | 10  | 15  | 8   | 3   | 1   | 0   | 2   | 0   | 1   | 2.6 | 1.8 | 3%  | 8%  | 10% | 83% | 2.0   | 3.2   | 3rd  | Yes       |
| <i>For following 2 items, consider only patients with psychosis:</i>                                                               |    |     |     |     |     |     |     |     |     |     |     |     |     |     |     |     |       |       |      |           |
| Possible exacerbation of paranoid symptoms related to being monitored or "controlled"                                              | 40 | 9   | 2   | 3   | 4   | 4   | 3   | 6   | 8   | 1   | 4.8 | 2.7 | 3%  | 38% | 28% | 35% | 3.9   | 5.6   | 2nd  | No        |
| Patient misinterprets interactions with the digital health tool because of paranoid delusions                                      | 40 | 7   | 4   | 5   | 3   | 4   | 3   | 5   | 8   | 1   | 4.7 | 2.7 | 3%  | 35% | 25% | 40% | 3.9   | 5.5   | 2nd  | No        |

Question 6. Potential benefits of using a digital health tool for HEALTH CARE PROFESSIONALS. Assume the items below have been demonstrated to be benefits of using a digital health tool for HCPs who treat patients with psychiatric disorders. For each, please rate how likely you believe it would be to motivate an HCP to use the digital health tool.

Please rate each item on a scale from 1 to 9 with 1 = not at all likely to motivate HCP 5 = somewhat likely to motivate HCP 9 = extremely likely to motivate HCP

|                                                                                                                                                                          | N  | "1" | "2" | "3" | "4" | "5" | "6" | "7" | "8" | "9" | Avg | SD  | Chc | 1st | 2nd | 3rd | Cl_lo | Cl_hi | Rank | Consensus |
|--------------------------------------------------------------------------------------------------------------------------------------------------------------------------|----|-----|-----|-----|-----|-----|-----|-----|-----|-----|-----|-----|-----|-----|-----|-----|-------|-------|------|-----------|
| Reimbursement by payers for time spent providing training to patients and family members about the digital health tool                                                   | 39 | 0   | 0   | 0   | 0   | 1   | 1   | 1   | 12  | 24  | 8.5 | 0.9 | 62% | 95% | 5%  | 0%  | 8.2   | 8.7   | Chc  | Yes       |
| Reimbursement by payers for time spent using/reviewing data from the digital health tool                                                                                 | 40 | 0   | 1   | 0   | 0   | 1   | 1   | 0   | 11  | 26  | 8.4 | 1.3 | 65% | 93% | 5%  | 3%  | 8.0   | 8.8   | Chc  | Yes       |
| Improved patient adherence to medication and treatment plan                                                                                                              | 40 | 0   | 0   | 1   | 0   | 0   | 2   | 8   | 14  | 15  | 8.0 | 1.2 | 38% | 93% | 5%  | 3%  | 7.6   | 8.3   | 1st  | Yes       |
| Improved patient functioning (e.g., social and work functioning)                                                                                                         | 39 | 0   | 0   | 0   | 0   | 0   | 4   | 9   | 12  | 14  | 7.9 | 1.0 | 36% | 90% | 10% | 0%  | 7.6   | 8.2   | 1st  | Yes       |
| Reduced patient symptomatology                                                                                                                                           | 39 | 0   | 0   | 0   | 0   | 1   | 2   | 9   | 14  | 13  | 7.9 | 1.0 | 33% | 92% | 8%  | 0%  | 7.6   | 8.2   | 1st  | Yes       |
| Increased efficiency of care provision by freeing up HCP's time without compromising quality of care (i.e., technology as a treatment extender to reduce HCP burden)     | 39 | 0   | 1   | 0   | 0   | 1   | 3   | 9   | 10  | 15  | 7.8 | 1.4 | 38% | 87% | 10% | 3%  | 7.3   | 8.2   | 1st  | Yes       |
| Increased ability to deliver evidence-based treatments that would not otherwise be delivered because of limited staff resources, limited trained staff, or cost barriers | 40 | 0   | 0   | 0   | 0   | 3   | 5   | 7   | 17  | 8   | 7.6 | 1.2 | 20% | 80% | 20% | 0%  | 7.2   | 7.9   | 1st  | Yes       |
| More accurate data about medication adherence                                                                                                                            | 40 | 0   | 0   | 1   | 1   | 1   | 3   | 9   | 17  | 8   | 7.5 | 1.3 | 20% | 85% | 13% | 3%  | 7.1   | 7.9   | 1st  | Yes       |
| Digital health tool provides input to common electronic health record (EHR) systems already in use                                                                       | 39 | 0   | 0   | 0   | 0   | 5   | 1   | 13  | 10  | 10  | 7.5 | 1.3 | 26% | 85% | 15% | 0%  | 7.1   | 7.9   | 1st  | Yes       |
| Published evidence concerning efficacy of the digital health tool in improving patient outcomes                                                                          | 38 | 0   | 0   | 0   | 0   | 4   | 5   | 7   | 14  | 8   | 7.4 | 1.3 | 21% | 76% | 24% | 0%  | 7.0   | 7.9   | 1st  | Yes       |
| Replacing routine assessment and monitoring functions, thus increasing availability of HCP for more complex cases                                                        | 40 | 0   | 2   | 0   | 0   | 0   | 4   | 14  | 9   | 11  | 7.4 | 1.6 | 28% | 85% | 10% | 5%  | 6.9   | 7.9   | 1st  | Yes       |
| Reduction in number of hospitalizations                                                                                                                                  | 40 | 0   | 1   | 0   | 1   | 3   | 7   | 10  | 8   | 10  | 7.2 | 1.6 | 25% | 70% | 28% | 3%  | 6.7   | 7.7   | 1st  | Yes       |
| Potential to achieve improved patient outcomes by being able to make more evidence-based treatment decisions                                                             | 40 | 0   | 0   | 0   | 0   | 5   | 5   | 15  | 8   | 7   | 7.2 | 1.2 | 18% | 75% | 25% | 0%  | 6.8   | 7.6   | 1st  | Yes       |
| Improved accuracy of information for clinical decision-making based on objective momentary data about patient symptoms                                                   | 39 | 0   | 0   | 0   | 2   | 4   | 6   | 9   | 10  | 8   | 7.2 | 1.5 | 21% | 69% | 31% | 0%  | 6.7   | 7.6   | 1st  | Yes       |
| Access to more patient information (e.g., about adherence, symptoms)                                                                                                     | 40 | 0   | 0   | 0   | 0   | 2   | 10  | 14  | 9   | 5   | 7.1 | 1.1 | 13% | 70% | 30% | 0%  | 6.8   | 7.5   | 1st  | Yes       |
| Ability to provide state-of-the-art treatment tools                                                                                                                      | 40 | 0   | 1   | 0   | 1   | 3   | 7   | 13  | 10  | 5   | 7.0 | 1.5 | 13% | 70% | 28% | 3%  | 6.5   | 7.4   | 1st  | Yes       |
| Ability of multiple HCPs involved in patient's care (e.g., case manager, psychologist) to access the data                                                                | 40 | 0   | 1   | 0   | 1   | 3   | 10  | 9   | 10  | 6   | 7.0 | 1.5 | 15% | 63% | 35% | 3%  | 6.5   | 7.4   | 2nd  | Yes       |
| Increased ability to personalize/tailor the treatment approach to the specific patient                                                                                   | 40 | 0   | 1   | 0   | 1   | 3   | 12  | 7   | 10  | 6   | 6.9 | 1.5 | 15% | 58% | 40% | 3%  | 6.4   | 7.4   | 2nd  | Yes       |
| Around the clock capability to assess and intervene with at-risk patients (e.g., with suicidal risk or increased agitation/aggression) in a way that may increase safety | 40 | 0   | 1   | 2   | 2   | 6   | 4   | 7   | 8   | 10  | 6.8 | 2.0 | 25% | 63% | 30% | 8%  | 6.2   | 7.4   | 2nd  | Yes       |
| Facilitation of patient disclosure about topics that patients may be reluctant to share in traditional face-to-face settings                                             | 40 | 0   | 1   | 1   | 0   | 4   | 8   | 13  | 11  | 2   | 6.8 | 1.4 | 5%  | 65% | 30% | 5%  | 6.3   | 7.2   | 2nd  | Yes       |
| Improved accuracy of information for clinical decision-making based on objective sensor data (e.g., external biometric sensors, GPS, Bluetooth)                          | 40 | 0   | 0   | 0   | 4   | 5   | 7   | 12  | 8   | 4   | 6.7 | 1.5 | 10% | 60% | 40% | 0%  | 6.2   | 7.1   | 2nd  | Yes       |
| Increased patient social engagement enabled by technology                                                                                                                | 39 | 0   | 0   | 1   | 1   | 6   | 9   | 10  | 10  | 2   | 6.6 | 1.4 | 5%  | 56% | 41% | 3%  | 6.2   | 7.1   | 2nd  | Yes       |
| Around the clock capability to identify potential problems/early warning signs of acute episodes in order to intervene more quickly                                      | 40 | 0   | 1   | 2   | 3   | 4   | 7   | 7   | 10  | 6   | 6.6 | 1.9 | 15% | 58% | 35% | 8%  | 6.0   | 7.2   | 2nd  | Yes       |
| Potential to reduce utilization of health care services (e.g., emergency, outpatient) and therefore cost of treatment                                                    | 39 | 0   | 1   | 2   | 0   | 4   | 9   | 13  | 7   | 3   | 6.6 | 1.6 | 8%  | 59% | 33% | 8%  | 6.1   | 7.1   | 2nd  | Yes       |
| Better understanding of patient's thinking, feelings, and behaviors                                                                                                      | 39 | 0   | 1   | 1   | 0   | 4   | 7   | 19  | 7   | 0   | 6.6 | 1.3 | 0%  | 67% | 28% | 5%  | 6.2   | 7.0   | 2nd  | Yes       |
| Increased confidence/self-efficacy related to the patient's health care                                                                                                  | 40 | 0   | 1   | 1   | 2   | 5   | 9   | 12  | 8   | 2   | 6.5 | 1.5 | 5%  | 55% | 40% | 5%  | 6.0   | 6.9   | 2nd  | Yes       |
| Improved communication/understanding between patients and family members because of family integration in digital system (assuming this is a goal of treatment)          | 40 | 0   | 1   | 0   | 2   | 5   | 11  | 15  | 4   | 2   | 6.4 | 1.4 | 5%  | 53% | 45% | 3%  | 6.0   | 6.8   | 2nd  | Yes       |

|                                                                                         |    |   |   |   |   |   |    |    |    |   |     |     |    |     |     |    |     |     |     |     |
|-----------------------------------------------------------------------------------------|----|---|---|---|---|---|----|----|----|---|-----|-----|----|-----|-----|----|-----|-----|-----|-----|
| Opportunity to provide feedback/support to patients between face-to-face sessions       | 40 | 1 | 0 | 2 | 1 | 6 | 9  | 10 | 10 | 1 | 6.4 | 1.7 | 3% | 53% | 40% | 8% | 5.8 | 6.9 | 2nd | Yes |
| Ability to engage periodically with patients after discharge from face-to-face sessions | 39 | 0 | 1 | 2 | 2 | 4 | 13 | 9  | 5  | 3 | 6.3 | 1.6 | 8% | 44% | 49% | 8% | 5.7 | 6.8 | 2nd | Yes |

Question 7. Potential barriers and/or unintended consequences for HEALTH CARE PROFESSIONALS. Listed below are some potential barriers to and unintended consequences of HCPs' use of a digital health tool with patients with psychiatric disorders. How likely do you believe each of the items is to be a potential barrier and/or to be or lead to an unintended consequence for HCPs using a digital health tool with their patients?

Please rate each item on a scale from 1 to 9 with 1 = significant potential to be a barrier and/or an unintended consequence for an HCP 5 = some potential to be a barrier and/or an unintended consequence for an HCP 9 = minimal potential to be a barrier and/or an unintended consequence for an HCP

7a. Concerns about process and credibility of intervention

|                                                                                                                                           | N  | "1" | "2" | "3" | "4" | "5" | "6" | "7" | "8" | "9" | Avg | SD  | Chc | 1st | 2nd | 3rd | CI_lo | CI_hi | Rank | Consensus |
|-------------------------------------------------------------------------------------------------------------------------------------------|----|-----|-----|-----|-----|-----|-----|-----|-----|-----|-----|-----|-----|-----|-----|-----|-------|-------|------|-----------|
| Loss of expert role due to inadequate technological knowledge                                                                             | 40 | 2   | 3   | 9   | 8   | 2   | 7   | 5   | 3   | 1   | 4.7 | 2.1 | 3%  | 23% | 43% | 35% | 4.0   | 5.3   | 2nd  | No        |
| Concern about validation of measures                                                                                                      | 40 | 3   | 2   | 8   | 10  | 5   | 5   | 4   | 2   | 1   | 4.5 | 2.0 | 3%  | 18% | 50% | 33% | 3.9   | 5.1   | 2nd  | Yes       |
| Concern about preserving the validity of evidence-based psychosocial interventions when delivered digitally                               | 40 | 4   | 7   | 6   | 5   | 5   | 2   | 6   | 4   | 1   | 4.4 | 2.4 | 3%  | 28% | 30% | 43% | 3.7   | 5.1   | 2nd  | No        |
| Uncertainty about how to discuss and explain the digital health tool to patients                                                          | 40 | 6   | 5   | 9   | 3   | 4   | 2   | 1   | 9   | 1   | 4.4 | 2.6 | 3%  | 28% | 23% | 50% | 3.6   | 5.2   | 2nd  | Yes       |
| Potential for blurring of patient-professional boundaries (e.g., digital tools allow contact outside scheduled face-to-face appointments) | 40 | 3   | 4   | 12  | 5   | 4   | 3   | 3   | 6   | 0   | 4.4 | 2.2 | 0%  | 23% | 30% | 48% | 3.7   | 5.0   | 2nd  | No        |
| Lack of centralized regulation/approval/rating body for novel technologies leads to unclear expected benefits                             | 40 | 2   | 6   | 9   | 7   | 5   | 4   | 5   | 1   | 1   | 4.3 | 2.0 | 3%  | 18% | 40% | 43% | 3.6   | 4.9   | 2nd  | No        |
| Inadequate information about how the processes delivered by digital systems can be integrated with in-person, usual care                  | 40 | 6   | 15  | 9   | 1   | 4   | 2   | 3   | 0   | 0   | 3.0 | 1.8 | 0%  | 8%  | 18% | 75% | 2.5   | 3.5   | 3rd  | Yes       |

7b. Concerns about usability/feasibility

|                                                                                                     | N  | "1" | "2" | "3" | "4" | "5" | "6" | "7" | "8" | "9" | Avg | SD  | Chc | 1st | 2nd | 3rd | CI_lo | CI_hi | Rank | Consensus |
|-----------------------------------------------------------------------------------------------------|----|-----|-----|-----|-----|-----|-----|-----|-----|-----|-----|-----|-----|-----|-----|-----|-------|-------|------|-----------|
| Concern that the tool has not gone through sufficient usability testing with psychiatric population | 40 | 4   | 6   | 15  | 4   | 5   | 4   | 2   | 0   | 0   | 3.5 | 1.6 | 0%  | 5%  | 33% | 63% | 3.0   | 4.0   | 3rd  | Yes       |
| HCP has doubts about the patient's ability to handle the required technology                        | 40 | 13  | 12  | 10  | 1   | 3   | 0   | 1   | 0   | 0   | 2.3 | 1.4 | 0%  | 3%  | 10% | 88% | 1.9   | 2.8   | 3rd  | Yes       |
| HCP considers the device a hassle/too time consuming to appropriately bring in to care              | 40 | 18  | 11  | 6   | 2   | 2   | 1   | 0   | 0   | 0   | 2.1 | 1.3 | 0%  | 0%  | 13% | 88% | 1.6   | 2.5   | 3rd  | Yes       |
| Patient does not have access to the required technology                                             | 40 | 19  | 13  | 5   | 1   | 1   | 0   | 1   | 0   | 0   | 1.9 | 1.3 | 0%  | 3%  | 5%  | 93% | 1.5   | 2.3   | 3rd  | Yes       |

7c. Liability and logistical issues

|                                                                                                                                                           | N  | "1" | "2" | "3" | "4" | "5" | "6" | "7" | "8" | "9" | Avg | SD  | Chc | 1st | 2nd | 3rd | CI_lo | CI_hi | Rank | Consensus |
|-----------------------------------------------------------------------------------------------------------------------------------------------------------|----|-----|-----|-----|-----|-----|-----|-----|-----|-----|-----|-----|-----|-----|-----|-----|-------|-------|------|-----------|
| Concern about patient confidentiality                                                                                                                     | 40 | 3   | 7   | 16  | 7   | 1   | 2   | 1   | 3   | 0   | 3.5 | 1.8 | 0%  | 10% | 25% | 65% | 3.0   | 4.1   | 3rd  | Yes       |
| Uncertainty about the frequency with which the digital data should be reviewed                                                                            | 40 | 4   | 7   | 10  | 8   | 6   | 4   | 1   | 0   | 0   | 3.5 | 1.6 | 0%  | 3%  | 45% | 53% | 3.0   | 4.0   | 3rd  | Yes       |
| Uncertainty about how to use the information clinically                                                                                                   | 40 | 7   | 8   | 8   | 8   | 8   | 0   | 1   | 0   | 0   | 3.2 | 1.5 | 0%  | 3%  | 40% | 58% | 2.7   | 3.6   | 3rd  | Yes       |
| Availability of too much information (e.g., HCP overwhelmed with additional patient information that needs consideration despite time-pressured schedule) | 40 | 12  | 8   | 13  | 3   | 1   | 2   | 0   | 1   | 0   | 2.6 | 1.6 | 0%  | 3%  | 15% | 83% | 2.1   | 3.1   | 3rd  | Yes       |
| Time/disruption involved in integrating digital data into clinical practice                                                                               | 40 | 11  | 9   | 12  | 5   | 3   | 0   | 0   | 0   | 0   | 2.5 | 1.2 | 0%  | 0%  | 20% | 80% | 2.1   | 2.9   | 3rd  | Yes       |
| Difficulty having the digital health tool approved by insurance                                                                                           | 40 | 14  | 11  | 8   | 3   | 3   | 0   | 0   | 1   | 0   | 2.4 | 1.5 | 0%  | 3%  | 15% | 83% | 1.9   | 2.8   | 3rd  | Yes       |
| Uncertainty about receiving reimbursement for time spent training or using the device and its data                                                        | 40 | 14  | 11  | 8   | 3   | 3   | 1   | 0   | 0   | 0   | 2.3 | 1.4 | 0%  | 0%  | 18% | 83% | 1.9   | 2.7   | 3rd  | Yes       |
| Concern about potential for increased liability exposure due to not having effected or documented a clinical response to available information            | 39 | 15  | 10  | 9   | 3   | 1   | 1   | 0   | 0   | 0   | 2.2 | 1.3 | 0%  | 0%  | 13% | 87% | 1.8   | 2.6   | 3rd  | Yes       |

7d. Unintended consequences

|                                                                                            | N  | "1" | "2" | "3" | "4" | "5" | "6" | "7" | "8" | "9" | Avg | SD  | Chc | 1st | 2nd | 3rd | CI_lo | CI_hi | Rank | Consensus |
|--------------------------------------------------------------------------------------------|----|-----|-----|-----|-----|-----|-----|-----|-----|-----|-----|-----|-----|-----|-----|-----|-------|-------|------|-----------|
| Patient discontinues needed traditional face-to-face treatment in favor of self-management | 40 | 2   | 4   | 6   | 7   | 3   | 5   | 5   | 7   | 1   | 5.0 | 2.3 | 3%  | 33% | 38% | 30% | 4.3   | 5.7   | 2nd  | No        |
| Distraction from therapy targets and tasks identified in session                           | 40 | 3   | 2   | 6   | 7   | 7   | 6   | 7   | 2   | 0   | 4.7 | 1.9 | 0%  | 23% | 50% | 28% | 4.1   | 5.3   | 2nd  | No        |



Question 16. Training for Health Care Professionals (HCPs) In the next two questions, we ask you to rate a number of different types of training and training resources for HCPs. In 16a, we ask you to rate how important different types of training and training resources would be in helping health care professionals prescribe and interact with a digital health tool. In 16b, we ask how likely you believe HCPs would be to participate in different types of training. Assume the HCP will receive computerized reports with the output from the digital tool.

16a. Importance to HCP's ability to prescribe and interact with digital health tool

Please rate each item on a scale from 1 to 9 with 1 = not at all important 5 = somewhat important 9 = extremely important

|                                                                                                                  | N  | "1" | "2" | "3" | "4" | "5" | "6" | "7" | "8" | "9" | Avg | SD  | Chc | 1st | 2nd | 3rd | CI_lo | CI_hi | Rank | Consensus |
|------------------------------------------------------------------------------------------------------------------|----|-----|-----|-----|-----|-----|-----|-----|-----|-----|-----|-----|-----|-----|-----|-----|-------|-------|------|-----------|
| Clear rationale provided to HCPs about how using this device can improve outcomes                                | 39 | 0   | 0   | 0   | 0   | 0   | 2   | 7   | 9   | 21  | 8.3 | 0.9 | 54% | 95% | 5%  | 0%  | 8.0   | 8.6   | Chc  | Yes       |
| Provision of hands-on work with device/dashboard during training sessions                                        | 39 | 0   | 0   | 0   | 0   | 1   | 4   | 10  | 6   | 18  | 7.9 | 1.2 | 46% | 87% | 13% | 0%  | 7.6   | 8.3   | 1st  | Yes       |
| Inclusion of clinical examples and case materials as core elements of the training.                              | 39 | 0   | 0   | 1   | 0   | 2   | 0   | 11  | 8   | 17  | 7.9 | 1.4 | 44% | 92% | 5%  | 3%  | 7.4   | 8.3   | 1st  | Yes       |
| Clear and concise tutorial provided in the digital device                                                        | 39 | 0   | 0   | 0   | 1   | 3   | 2   | 8   | 12  | 13  | 7.7 | 1.3 | 33% | 85% | 15% | 0%  | 7.3   | 8.1   | 1st  | Yes       |
| Technical call center support                                                                                    | 39 | 0   | 0   | 0   | 0   | 3   | 1   | 13  | 14  | 8   | 7.6 | 1.1 | 21% | 90% | 10% | 0%  | 7.2   | 7.9   | 1st  | Yes       |
| Prepared handouts to give to patients                                                                            | 38 | 0   | 0   | 1   | 2   | 3   | 1   | 12  | 7   | 12  | 7.4 | 1.6 | 32% | 82% | 16% | 3%  | 6.9   | 7.9   | 1st  | Yes       |
| In-person training sessions                                                                                      | 39 | 0   | 0   | 0   | 1   | 4   | 7   | 6   | 10  | 11  | 7.4 | 1.5 | 28% | 69% | 31% | 0%  | 6.9   | 7.8   | 1st  | Yes       |
| Simple platform that can be learned with user guide and video demonstration without requiring in-person training | 38 | 0   | 0   | 2   | 1   | 4   | 3   | 6   | 10  | 12  | 7.3 | 1.8 | 32% | 74% | 21% | 5%  | 6.8   | 7.9   | 1st  | Yes       |
| Having the HCP use the digital system as a "patient" for a trial period to become familiar with its features     | 39 | 0   | 1   | 0   | 2   | 3   | 3   | 12  | 7   | 11  | 7.2 | 1.7 | 28% | 77% | 21% | 3%  | 6.7   | 7.8   | 1st  | Yes       |
| Complete protocol and user guide                                                                                 | 39 | 0   | 1   | 1   | 0   | 2   | 4   | 12  | 13  | 6   | 7.2 | 1.5 | 15% | 79% | 15% | 5%  | 6.7   | 7.7   | 1st  | Yes       |
| Training provided in HCP's office (detailing approach)                                                           | 39 | 0   | 0   | 2   | 0   | 5   | 7   | 2   | 14  | 9   | 7.2 | 1.7 | 23% | 64% | 31% | 5%  | 6.7   | 7.7   | 1st  | Yes       |
| Availability of follow-up training sessions (if needed)                                                          | 39 | 0   | 0   | 0   | 3   | 1   | 7   | 9   | 13  | 6   | 7.2 | 1.4 | 15% | 72% | 28% | 0%  | 6.7   | 7.6   | 1st  | Yes       |
| CME credit for completing training                                                                               | 39 | 1   | 0   | 0   | 0   | 2   | 10  | 10  | 5   | 11  | 7.2 | 1.6 | 28% | 67% | 31% | 3%  | 6.7   | 7.7   | 1st  | Yes       |
| In-person training followed by web-based video reinforcement                                                     | 39 | 0   | 0   | 1   | 3   | 5   | 5   | 8   | 10  | 7   | 6.9 | 1.7 | 18% | 64% | 33% | 3%  | 6.4   | 7.4   | 2nd  | Yes       |
| Video-based online training module                                                                               | 39 | 0   | 0   | 2   | 2   | 4   | 5   | 15  | 9   | 2   | 6.6 | 1.5 | 5%  | 67% | 28% | 5%  | 6.2   | 7.1   | 2nd  | Yes       |
| Training webinars                                                                                                | 39 | 0   | 0   | 1   | 2   | 5   | 4   | 21  | 6   | 0   | 6.5 | 1.2 | 0%  | 69% | 28% | 3%  | 6.2   | 6.9   | 2nd  | Yes       |
| FAQs/user forums on a website                                                                                    | 39 | 0   | 1   | 2   | 2   | 3   | 9   | 10  | 8   | 4   | 6.5 | 1.7 | 10% | 56% | 36% | 8%  | 6.0   | 7.1   | 2nd  | Yes       |
| Online chat support for questions/technical issues                                                               | 39 | 2   | 0   | 1   | 3   | 7   | 8   | 10  | 6   | 2   | 6.1 | 1.8 | 5%  | 46% | 46% | 8%  | 5.5   | 6.6   | 2nd  | Yes       |
| Work with medical schools to provide training in digital health technology                                       | 39 | 0   | 2   | 3   | 2   | 8   | 9   | 8   | 2   | 5   | 5.9 | 1.9 | 13% | 38% | 49% | 13% | 5.4   | 6.5   | 2nd  | Yes       |
| Availability of consultation groups (e.g., groups involving other HCPs)                                          | 38 | 0   | 2   | 3   | 6   | 6   | 7   | 8   | 3   | 3   | 5.7 | 1.9 | 8%  | 37% | 50% | 13% | 5.1   | 6.3   | 2nd  | Yes       |

16b. Likelihood that HCP would participate in this type of training

Please rate each item on a scale from 1 to 9 with 1 = not at all likely 5 = somewhat likely 9 = extremely likely

|                                                                                                              | N  | "1" | "2" | "3" | "4" | "5" | "6" | "7" | "8" | "9" | Avg | SD  | Chc | 1st | 2nd | 3rd | CI_lo | CI_hi | Rank | Consensus |
|--------------------------------------------------------------------------------------------------------------|----|-----|-----|-----|-----|-----|-----|-----|-----|-----|-----|-----|-----|-----|-----|-----|-------|-------|------|-----------|
| Clear and concise tutorial provided in the digital device                                                    | 38 | 0   | 1   | 1   | 1   | 2   | 1   | 11  | 12  | 9   | 7.3 | 1.7 | 24% | 84% | 11% | 5%  | 6.8   | 7.9   | 1st  | Yes       |
| Individualized training provided in HCP's office                                                             | 38 | 0   | 0   | 2   | 1   | 2   | 7   | 9   | 6   | 11  | 7.2 | 1.7 | 29% | 68% | 26% | 5%  | 6.6   | 7.7   | 1st  | Yes       |
| Technical call center support                                                                                | 38 | 0   | 2   | 0   | 6   | 2   | 7   | 10  | 7   | 4   | 6.4 | 1.9 | 11% | 55% | 39% | 5%  | 5.8   | 7.0   | 2nd  | Yes       |
| Training webinars                                                                                            | 38 | 0   | 1   | 1   | 3   | 8   | 7   | 14  | 4   | 0   | 6.0 | 1.4 | 0%  | 47% | 47% | 5%  | 5.6   | 6.5   | 2nd  | Yes       |
| Follow-up training sessions (if needed)                                                                      | 38 | 1   | 0   | 4   | 1   | 6   | 8   | 11  | 7   | 0   | 6.0 | 1.7 | 0%  | 47% | 39% | 13% | 5.5   | 6.5   | 2nd  | Yes       |
| In-person training sessions                                                                                  | 38 | 0   | 1   | 5   | 3   | 6   | 6   | 11  | 1   | 5   | 5.9 | 1.9 | 13% | 45% | 39% | 16% | 5.3   | 6.5   | 2nd  | Yes       |
| Having the HCP use the digital system as a "patient" for a trial period to become familiar with its features | 38 | 2   | 4   | 1   | 2   | 2   | 9   | 10  | 4   | 4   | 5.9 | 2.3 | 11% | 47% | 34% | 18% | 5.1   | 6.6   | 2nd  | No        |
| Video-based online training module                                                                           | 38 | 0   | 1   | 3   | 3   | 9   | 8   | 8   | 4   | 2   | 5.8 | 1.7 | 5%  | 37% | 53% | 11% | 5.3   | 6.4   | 2nd  | Yes       |
| Complete protocol and user guide                                                                             | 38 | 0   | 0   | 5   | 9   | 4   | 6   | 5   | 6   | 3   | 5.7 | 1.9 | 8%  | 37% | 50% | 13% | 5.1   | 6.3   | 2nd  | Yes       |
| FAQs/user forums on a website                                                                                | 38 | 2   | 1   | 4   | 2   | 6   | 8   | 6   | 8   | 1   | 5.7 | 2.1 | 3%  | 39% | 42% | 18% | 5.0   | 6.4   | 2nd  | No        |
| In-person training followed by web-based video reinforcement                                                 | 38 | 0   | 2   | 4   | 5   | 5   | 9   | 8   | 5   | 0   | 5.6 | 1.8 | 0%  | 34% | 50% | 16% | 5.0   | 6.1   | 2nd  | Yes       |
| Online chat support for questions/technical issues                                                           | 38 | 1   | 2   | 6   | 5   | 5   | 8   | 6   | 4   | 1   | 5.2 | 2.0 | 3%  | 29% | 47% | 24% | 4.6   | 5.9   | 2nd  | No        |
| Consultation groups (e.g., groups involving other HCPs)                                                      | 38 | 3   | 3   | 8   | 1   | 4   | 8   | 10  | 1   | 0   | 4.8 | 2.1 | 0%  | 29% | 34% | 37% | 4.1   | 5.5   | 2nd  | No        |

Question 17. Provision of training and support to PATIENTS by HCPs Assume that the digital health tool designed for use with a patient with serious mental illness will be prescribed and monitored by an HCP. When we refer to HCPs here, we mean any professional providing health care services to patients with mental illnesses (e.g., psychiatrist, psychologist, nurse practitioner, clinical social worker). Thus, the HCP will be part of the system so that the design of the HCP's participation must be optimized. In the next two questions, we ask you to rate a number of different types of training and training resources for patients that would be provided by HCPs in terms of 17a) how important they would be in helping patients successfully engage with and use a digital health tool and then 17b) how difficult you believe each activity would be for the average HCP. Assume the HCP will receive computerized reports with the output from the digital tool.

17a. How IMPORTANT would each activity be in order to enable patients to successfully engage with and use a digital health tool?

Please rate each item on a scale from 1 to 9 with 1 = not at all important 5 = somewhat important 9 = extremely important

|                                                                                                                                                              | N  | "1" | "2" | "3" | "4" | "5" | "6" | "7" | "8" | "9" | Avg | SD  | Chc | 1st | 2nd | 3rd | CI_lo | CI_hi | Rank | Consensus |
|--------------------------------------------------------------------------------------------------------------------------------------------------------------|----|-----|-----|-----|-----|-----|-----|-----|-----|-----|-----|-----|-----|-----|-----|-----|-------|-------|------|-----------|
| Initial training of patients on the system                                                                                                                   | 39 | 0   | 0   | 0   | 0   | 0   | 1   | 6   | 7   | 25  | 8.4 | 0.9 | 64% | 97% | 3%  | 0%  | 8.2   | 8.7   | Chc  | Yes       |
| Responding to technical problems identified by patients as quickly as possible                                                                               | 39 | 0   | 0   | 0   | 0   | 2   | 1   | 10  | 10  | 16  | 7.9 | 1.1 | 41% | 92% | 8%  | 0%  | 7.6   | 8.3   | 1st  | Yes       |
| Verbalizing or otherwise providing specific and clear feedback about the data gathered via the digital health tools during treatment sessions                | 39 | 0   | 0   | 0   | 0   | 1   | 3   | 11  | 14  | 10  | 7.7 | 1.0 | 26% | 90% | 10% | 0%  | 7.4   | 8.1   | 1st  | Yes       |
| Providing reinforcement for patient's continued engagement with tools, independent of clinical information reported or outcomes within the first week of use | 39 | 0   | 0   | 0   | 1   | 2   | 3   | 8   | 15  | 10  | 7.6 | 1.2 | 26% | 85% | 15% | 0%  | 7.3   | 8.0   | 1st  | Yes       |
| Arranging for treatment coordinator or other member of the treatment team to provide ad hoc support for system use                                           | 39 | 0   | 0   | 0   | 0   | 1   | 4   | 14  | 13  | 7   | 7.5 | 1.0 | 18% | 87% | 13% | 0%  | 7.2   | 7.9   | 1st  | Yes       |
| Developing ongoing reinforcement/reward systems for successful engagement with tools and/or successful self-management                                       | 38 | 0   | 0   | 1   | 0   | 2   | 3   | 8   | 17  | 7   | 7.5 | 1.3 | 18% | 84% | 13% | 3%  | 7.1   | 7.9   | 1st  | Yes       |
| Helping patients set goals and tasks on digital health tools                                                                                                 | 39 | 0   | 0   | 0   | 1   | 2   | 4   | 12  | 9   | 11  | 7.5 | 1.3 | 28% | 82% | 18% | 0%  | 7.1   | 7.9   | 1st  | Yes       |
| Identifying trends in digital data and responding immediately to critical clinical information                                                               | 39 | 0   | 1   | 0   | 0   | 1   | 5   | 13  | 9   | 10  | 7.4 | 1.4 | 26% | 82% | 15% | 3%  | 7.0   | 7.9   | 1st  | Yes       |
| Providing reinforcement for patient's continued engagement with tools, independent of clinical information reported or outcomes on an ongoing basis          | 39 | 0   | 0   | 0   | 1   | 3   | 3   | 13  | 10  | 9   | 7.4 | 1.3 | 23% | 82% | 18% | 0%  | 7.0   | 7.8   | 1st  | Yes       |
| Follow-up/ongoing training on the system                                                                                                                     | 39 | 0   | 0   | 0   | 2   | 3   | 7   | 12  | 7   | 8   | 7.1 | 1.4 | 21% | 69% | 31% | 0%  | 6.7   | 7.5   | 1st  | Yes       |
| Initial training of family caregivers (if applicable) on the system                                                                                          | 38 | 1   | 0   | 0   | 3   | 3   | 7   | 7   | 10  | 7   | 6.9 | 1.8 | 18% | 63% | 34% | 3%  | 6.3   | 7.5   | 2nd  | Yes       |
| Verbalizing or otherwise providing specific and clear feedback about the data gathered via the digital health tools between treatment sessions               | 39 | 0   | 2   | 0   | 3   | 4   | 9   | 10  | 7   | 4   | 6.5 | 1.7 | 10% | 54% | 41% | 5%  | 5.9   | 7.0   | 2nd  | Yes       |
| Sharing information with family/caregivers                                                                                                                   | 38 | 1   | 0   | 2   | 4   | 13  | 9   | 3   | 6   | 0   | 5.6 | 1.6 | 0%  | 24% | 68% | 8%  | 5.1   | 6.1   | 2nd  | Yes       |

17b. How DIFFICULT would each activity would be for the average HCP?

Please rate each item on a scale from 1 to 9 with 1 = extremely difficult 5 = somewhat difficult 9 = not at all difficult

|                                                                                                                                                              | N  | "1" | "2" | "3" | "4" | "5" | "6" | "7" | "8" | "9" | Avg | SD  | Chc | 1st | 2nd | 3rd | CI_lo | CI_hi | Rank | Consensus |
|--------------------------------------------------------------------------------------------------------------------------------------------------------------|----|-----|-----|-----|-----|-----|-----|-----|-----|-----|-----|-----|-----|-----|-----|-----|-------|-------|------|-----------|
| Verbalizing or otherwise providing specific and clear feedback about the data gathered via the digital health tools during treatment sessions                | 39 | 0   | 0   | 4   | 4   | 5   | 4   | 13  | 7   | 2   | 6.2 | 1.7 | 5%  | 56% | 33% | 10% | 5.7   | 6.7   | 2nd  | Yes       |
| Providing reinforcement for patient's continued engagement with tools, independent of clinical information reported or outcomes within the first week of use | 39 | 0   | 1   | 2   | 4   | 7   | 5   | 12  | 5   | 3   | 6.2 | 1.7 | 8%  | 51% | 41% | 8%  | 5.6   | 6.7   | 2nd  | Yes       |
| Helping patients set goals and tasks on digital health tools                                                                                                 | 39 | 0   | 1   | 6   | 1   | 8   | 7   | 9   | 3   | 4   | 5.9 | 1.9 | 10% | 41% | 41% | 18% | 5.3   | 6.5   | 2nd  | Yes       |
| Initial training of patients on the system                                                                                                                   | 39 | 0   | 1   | 6   | 7   | 11  | 4   | 5   | 2   | 3   | 5.3 | 1.8 | 8%  | 26% | 56% | 18% | 4.7   | 5.8   | 2nd  | Yes       |
| Arranging for treatment coordinator or other member of the treatment team to provide ad hoc support for system use                                           | 39 | 0   | 4   | 7   | 4   | 5   | 7   | 7   | 3   | 2   | 5.2 | 2.1 | 5%  | 31% | 41% | 28% | 4.6   | 5.8   | 2nd  | No        |
| Follow-up/ongoing training on the system                                                                                                                     | 38 | 0   | 3   | 3   | 8   | 9   | 7   | 4   | 2   | 2   | 5.2 | 1.8 | 5%  | 21% | 63% | 16% | 4.6   | 5.7   | 2nd  | Yes       |
| Providing reinforcement for patient's continued engagement with tools, independent of clinical information reported or outcomes on an ongoing basis          | 39 | 0   | 4   | 5   | 10  | 4   | 2   | 9   | 4   | 1   | 5.1 | 2.0 | 3%  | 36% | 41% | 23% | 4.5   | 5.7   | 2nd  | No        |
| Developing ongoing reinforcement/reward systems for successful engagement with tools and/or successful self-management                                       | 39 | 0   | 5   | 4   | 5   | 11  | 7   | 4   | 2   | 1   | 4.9 | 1.8 | 3%  | 18% | 59% | 23% | 4.4   | 5.5   | 2nd  | Yes       |
| Sharing information with family/caregivers                                                                                                                   | 39 | 1   | 3   | 8   | 6   | 8   | 7   | 3   | 1   | 2   | 4.7 | 1.9 | 5%  | 15% | 54% | 31% | 4.1   | 5.3   | 2nd  | Yes       |
| Initial training of family caregivers (if applicable) on the system                                                                                          | 39 | 2   | 3   | 11  | 6   | 5   | 5   | 3   | 2   | 2   | 4.5 | 2.1 | 5%  | 18% | 41% | 41% | 3.8   | 5.1   | 2nd  | No        |
| Identifying trends in digital data and responding immediately to critical clinical information                                                               | 38 | 5   | 6   | 3   | 9   | 9   | 1   | 3   | 2   | 0   | 3.9 | 2.0 | 0%  | 13% | 50% | 37% | 3.3   | 4.6   | 3rd  | Yes       |
| Verbalizing or otherwise providing specific and clear feedback about the data gathered via the digital health tools between treatment sessions               | 39 | 2   | 5   | 14  | 7   | 3   | 4   | 4   | 0   | 0   | 3.8 | 1.7 | 0%  | 10% | 36% | 54% | 3.3   | 4.3   | 3rd  | Yes       |
| Responding to technical problems identified by patients as quickly as possible                                                                               | 39 | 8   | 7   | 10  | 5   | 3   | 3   | 2   | 1   | 0   | 3.3 | 1.9 | 0%  | 8%  | 28% | 64% | 2.7   | 3.9   | 3rd  | Yes       |

Question 19. Patient characteristics that affect outcomes in psychotherapy/psychosocial interventions How much do you believe the following patient characteristics affect the chances of achieving favorable outcomes in psychotherapy/psychosocial interventions? Thinking about this question, please use your experience with all types of therapies/interventions and different types of patients.

Please rate each item on a scale from 1 to 9 with 1 = likely to have a very adverse effect on outcomes 5 = not likely to influence outcomes much one way or another 9 = extremely likely to promote good outcomes.

19a. Patient Characteristics

|                                                                                                                                                           | N  | "1" | "2" | "3" | "4" | "5" | "6" | "7" | "8" | "9" | Avg | SD  | Chc | 1st | 2nd | 3rd | CI_lo | CI_hi | Rank | Consensus |
|-----------------------------------------------------------------------------------------------------------------------------------------------------------|----|-----|-----|-----|-----|-----|-----|-----|-----|-----|-----|-----|-----|-----|-----|-----|-------|-------|------|-----------|
| Positive expectations about therapy on the part of the patient                                                                                            | 34 | 0   | 0   | 0   | 0   | 1   | 1   | 12  | 10  | 10  | 7.8 | 1.0 | 29% | 94% | 6%  | 0%  | 7.5   | 8.1   | 1st  | Yes       |
| Resources that facilitate access to treatment (availability of transportation, availability of HCPs trained to provide psychotherapy, insurance coverage) | 34 | 0   | 0   | 0   | 0   | 0   | 3   | 11  | 13  | 7   | 7.7 | 0.9 | 21% | 91% | 9%  | 0%  | 7.4   | 8.0   | 1st  | Yes       |
| Positive social support (i.e., patient has an involved significant other or caregiver)                                                                    | 34 | 0   | 1   | 0   | 0   | 0   | 5   | 9   | 12  | 7   | 7.5 | 1.4 | 21% | 82% | 15% | 3%  | 7.0   | 7.9   | 1st  | Yes       |
| Bachelor's degree or more education                                                                                                                       | 34 | 0   | 0   | 0   | 0   | 7   | 12  | 11  | 4   | 0   | 6.4 | 0.9 | 0%  | 44% | 56% | 0%  | 6.0   | 6.7   | 2nd  | Yes       |
| Currently married                                                                                                                                         | 33 | 0   | 0   | 0   | 0   | 16  | 6   | 9   | 1   | 1   | 5.9 | 1.1 | 3%  | 33% | 67% | 0%  | 5.6   | 6.3   | 2nd  | Yes       |
| 18-44 years old                                                                                                                                           | 34 | 1   | 0   | 1   | 0   | 16  | 6   | 6   | 3   | 1   | 5.7 | 1.5 | 3%  | 29% | 65% | 6%  | 5.2   | 6.2   | 2nd  | Yes       |
| < 18 years old                                                                                                                                            | 34 | 0   | 0   | 3   | 3   | 15  | 4   | 4   | 4   | 1   | 5.6 | 1.5 | 3%  | 26% | 65% | 9%  | 5.0   | 6.1   | 2nd  | Yes       |
| High school or more education                                                                                                                             | 34 | 0   | 0   | 0   | 1   | 17  | 13  | 3   | 0   | 0   | 5.5 | 0.7 | 0%  | 9%  | 91% | 0%  | 5.3   | 5.8   | 2nd  | Yes       |
| 45-64 years old                                                                                                                                           | 34 | 0   | 0   | 0   | 5   | 16  | 7   | 3   | 3   | 0   | 5.5 | 1.1 | 0%  | 18% | 82% | 0%  | 5.1   | 5.9   | 2nd  | Yes       |
| Female gender                                                                                                                                             | 34 | 0   | 1   | 0   | 0   | 18  | 11  | 4   | 0   | 0   | 5.5 | 0.9 | 0%  | 12% | 85% | 3%  | 5.2   | 5.8   | 2nd  | Yes       |
| 65+ years old                                                                                                                                             | 33 | 0   | 1   | 2   | 3   | 16  | 7   | 2   | 2   | 0   | 5.2 | 1.3 | 0%  | 12% | 79% | 9%  | 4.8   | 5.6   | 2nd  | Yes       |
| Male gender                                                                                                                                               | 34 | 0   | 1   | 0   | 7   | 24  | 1   | 1   | 0   | 0   | 4.8 | 0.8 | 0%  | 3%  | 94% | 3%  | 4.5   | 5.1   | 2nd  | Yes       |
| Minority status                                                                                                                                           | 34 | 0   | 0   | 1   | 10  | 21  | 1   | 1   | 0   | 0   | 4.7 | 0.7 | 0%  | 3%  | 94% | 3%  | 4.5   | 5.0   | 2nd  | Yes       |
| Low socioeconomic status                                                                                                                                  | 34 | 1   | 0   | 6   | 16  | 10  | 1   | 0   | 0   | 0   | 4.1 | 0.9 | 0%  | 0%  | 79% | 21% | 3.8   | 4.4   | 2nd  | Yes       |
| Did not complete high school                                                                                                                              | 34 | 0   | 0   | 9   | 16  | 7   | 2   | 0   | 0   | 0   | 4.1 | 0.9 | 0%  | 0%  | 74% | 26% | 3.8   | 4.3   | 2nd  | Yes       |
| Low health literacy                                                                                                                                       | 34 | 0   | 4   | 12  | 11  | 7   | 0   | 0   | 0   | 0   | 3.6 | 1.0 | 0%  | 0%  | 53% | 47% | 3.3   | 3.9   | 3rd  | Yes       |
| Low literacy (i.e., reading ability)/low numeracy                                                                                                         | 34 | 0   | 4   | 15  | 10  | 5   | 0   | 0   | 0   | 0   | 3.5 | 0.9 | 0%  | 0%  | 44% | 56% | 3.2   | 3.8   | 3rd  | Yes       |
| Low IQ                                                                                                                                                    | 34 | 1   | 5   | 14  | 9   | 4   | 1   | 0   | 0   | 0   | 3.4 | 1.1 | 0%  | 0%  | 41% | 59% | 3.0   | 3.7   | 3rd  | Yes       |
| Severe psychosocial stressors (e.g., poverty, general medical problems, abusive relationship, legal problems)                                             | 34 | 5   | 11  | 12  | 4   | 1   | 1   | 0   | 0   | 0   | 2.6 | 1.2 | 0%  | 0%  | 18% | 82% | 2.3   | 3.0   | 3rd  | Yes       |
| Serious level of chaos and disorganization in the person's life/environment                                                                               | 33 | 6   | 15  | 10  | 1   | 0   | 1   | 0   | 0   | 0   | 2.3 | 1.0 | 0%  | 0%  | 6%  | 94% | 2.0   | 2.6   | 3rd  | Yes       |
| Low motivation                                                                                                                                            | 33 | 11  | 13  | 7   | 2   | 0   | 0   | 0   | 0   | 0   | 2.0 | 0.9 | 0%  | 0%  | 6%  | 94% | 1.7   | 2.3   | 3rd  | Yes       |

19b. Disorders, Signs, and Symptoms

|                                               | N  | "1" | "2" | "3" | "4" | "5" | "6" | "7" | "8" | "9" | Avg | SD  | Chc | 1st | 2nd | 3rd | CI_lo | CI_hi | Rank | Consensus |
|-----------------------------------------------|----|-----|-----|-----|-----|-----|-----|-----|-----|-----|-----|-----|-----|-----|-----|-----|-------|-------|------|-----------|
| Good occupational functioning                 | 34 | 0   | 0   | 0   | 0   | 1   | 7   | 15  | 11  | 0   | 7.1 | 0.8 | 0%  | 76% | 24% | 0%  | 6.8   | 7.3   | 1st  | Yes       |
| Diagnosis of major depressive disorder        | 34 | 0   | 0   | 0   | 5   | 18  | 6   | 4   | 1   | 0   | 5.4 | 1.0 | 0%  | 15% | 85% | 0%  | 5.0   | 5.7   | 2nd  | Yes       |
| Diagnosis of bipolar disorder                 | 34 | 0   | 2   | 1   | 6   | 18  | 4   | 3   | 0   | 0   | 4.9 | 1.1 | 0%  | 9%  | 82% | 9%  | 4.5   | 5.3   | 2nd  | Yes       |
| Suicidal ideation                             | 34 | 2   | 2   | 1   | 5   | 20  | 2   | 2   | 0   | 0   | 4.6 | 1.4 | 0%  | 6%  | 79% | 15% | 4.1   | 5.0   | 2nd  | Yes       |
| Diagnosis of schizophrenia                    | 34 | 1   | 1   | 8   | 7   | 14  | 2   | 1   | 0   | 0   | 4.2 | 1.2 | 0%  | 3%  | 68% | 29% | 3.8   | 4.6   | 2nd  | Yes       |
| Sensitivity to overstimulation                | 34 | 0   | 2   | 6   | 10  | 15  | 0   | 1   | 0   | 0   | 4.2 | 1.0 | 0%  | 3%  | 74% | 24% | 3.9   | 4.6   | 2nd  | Yes       |
| Longer duration of illness                    | 34 | 0   | 4   | 8   | 5   | 14  | 3   | 0   | 0   | 0   | 4.1 | 1.2 | 0%  | 0%  | 65% | 35% | 3.7   | 4.5   | 2nd  | Yes       |
| Non-suicidal self-injurious behaviors         | 34 | 1   | 4   | 7   | 4   | 15  | 2   | 1   | 0   | 0   | 4.1 | 1.4 | 0%  | 3%  | 62% | 35% | 3.7   | 4.6   | 2nd  | Yes       |
| Multiple previous episodes                    | 33 | 3   | 1   | 5   | 9   | 13  | 1   | 1   | 0   | 0   | 4.1 | 1.4 | 0%  | 3%  | 70% | 27% | 3.6   | 4.5   | 2nd  | Yes       |
| Multiple comorbid Axis I disorders            | 34 | 2   | 2   | 8   | 11  | 10  | 0   | 1   | 0   | 0   | 3.9 | 1.3 | 0%  | 3%  | 62% | 35% | 3.4   | 4.3   | 3rd  | Yes       |
| Low frustration tolerance                     | 34 | 0   | 2   | 13  | 15  | 3   | 1   | 0   | 0   | 0   | 3.6 | 0.8 | 0%  | 0%  | 56% | 44% | 3.4   | 3.9   | 3rd  | Yes       |
| Low energy/fatigue                            | 34 | 0   | 2   | 16  | 11  | 5   | 0   | 0   | 0   | 0   | 3.6 | 0.8 | 0%  | 0%  | 47% | 53% | 3.3   | 3.8   | 3rd  | Yes       |
| Presence of Axis II comorbidity               | 34 | 3   | 2   | 12  | 11  | 5   | 1   | 0   | 0   | 0   | 3.5 | 1.2 | 0%  | 0%  | 50% | 50% | 3.1   | 3.9   | 3rd  | Yes       |
| Greater severity of delusions/paranoia        | 34 | 3   | 3   | 13  | 7   | 7   | 1   | 0   | 0   | 0   | 3.4 | 1.3 | 0%  | 0%  | 44% | 56% | 3.0   | 3.9   | 3rd  | Yes       |
| Aggression/agitation                          | 34 | 1   | 6   | 12  | 12  | 2   | 1   | 0   | 0   | 0   | 3.3 | 1.0 | 0%  | 0%  | 44% | 56% | 3.0   | 3.7   | 3rd  | Yes       |
| Greater severity of neurocognitive impairment | 34 | 0   | 12  | 8   | 9   | 5   | 0   | 0   | 0   | 0   | 3.2 | 1.1 | 0%  | 0%  | 41% | 59% | 2.8   | 3.6   | 3rd  | Yes       |
| Greater severity of negative symptoms         | 34 | 3   | 8   | 15  | 3   | 4   | 0   | 1   | 0   | 0   | 3.0 | 1.3 | 0%  | 3%  | 21% | 76% | 2.6   | 3.5   | 3rd  | Yes       |
| Greater severity of disorganization symptoms  | 34 | 3   | 7   | 17  | 4   | 2   | 0   | 1   | 0   | 0   | 3.0 | 1.2 | 0%  | 3%  | 18% | 79% | 2.6   | 3.4   | 3rd  | Yes       |
| Acute substance use                           | 34 | 6   | 13  | 10  | 4   | 1   | 0   | 0   | 0   | 0   | 2.4 | 1.0 | 0%  | 0%  | 15% | 85% | 2.1   | 2.8   | 3rd  | Yes       |

19c. Appraisals and Patient Experience

|                                                                                                                | <i>N</i> | "1" | "2" | "3" | "4" | "5" | "6" | "7" | "8" | "9" | <i>Avg</i> | <i>SD</i> | <i>Chc</i> | <i>1st</i> | <i>2nd</i> | <i>3rd</i> | <i>CI_lo</i> | <i>CI_hi</i> | <i>Rank</i> | <i>Consensus</i> |
|----------------------------------------------------------------------------------------------------------------|----------|-----|-----|-----|-----|-----|-----|-----|-----|-----|------------|-----------|------------|------------|------------|------------|--------------|--------------|-------------|------------------|
| Positive bond with healthcare professional (good therapeutic alliance)                                         | 34       | 0   | 0   | 0   | 0   | 0   | 0   | 10  | 13  | 11  | 8.0        | 0.8       | 32%        | 100%       | 0%         | 0%         | 7.8          | 8.3          | 1st         | Yes              |
| Perception of treatment as beneficial                                                                          | 34       | 0   | 0   | 0   | 0   | 0   | 1   | 9   | 14  | 10  | 8.0        | 0.8       | 29%        | 97%        | 3%         | 0%         | 7.7          | 8.3          | 1st         | Yes              |
| Self-efficacy beliefs about ability to participate in and benefit from psychotherapy/psychosocial intervention | 34       | 0   | 0   | 0   | 1   | 0   | 0   | 10  | 11  | 12  | 7.9        | 1.1       | 35%        | 97%        | 3%         | 0%         | 7.6          | 8.3          | 1st         | Yes              |
| Agreement with tasks and goals of treatment                                                                    | 34       | 0   | 0   | 0   | 0   | 0   | 1   | 13  | 10  | 10  | 7.9        | 0.9       | 29%        | 97%        | 3%         | 0%         | 7.6          | 8.2          | 1st         | Yes              |
| Willingness to complete tasks/homework between treatment sessions                                              | 34       | 0   | 0   | 0   | 1   | 1   | 4   | 9   | 8   | 11  | 7.6        | 1.3       | 32%        | 82%        | 18%        | 0%         | 7.2          | 8.1          | 1st         | Yes              |
| Readiness to change                                                                                            | 34       | 0   | 0   | 0   | 1   | 1   | 6   | 5   | 12  | 9   | 7.6        | 1.3       | 26%        | 76%        | 24%        | 0%         | 7.1          | 8.0          | 1st         | Yes              |
| History of good adherence to medication and other treatment                                                    | 34       | 0   | 0   | 0   | 2   | 0   | 3   | 15  | 9   | 5   | 7.3        | 1.2       | 15%        | 85%        | 15%        | 0%         | 6.9          | 7.7          | 1st         | Yes              |
| Psychological mindedness                                                                                       | 34       | 0   | 0   | 0   | 0   | 4   | 9   | 11  | 6   | 4   | 6.9        | 1.2       | 12%        | 62%        | 38%        | 0%         | 6.5          | 7.3          | 1st         | Yes              |
| Engagement with mutual help organizations and/or peer support groups                                           | 34       | 0   | 0   | 1   | 1   | 6   | 10  | 7   | 6   | 3   | 6.5        | 1.4       | 9%         | 47%        | 50%        | 3%         | 6.0          | 7.0          | 2nd         | Yes              |
| Stigma/discomfort/social anxiety about seeking care for mental or behavioral problems                          | 34       | 0   | 4   | 17  | 5   | 5   | 3   | 0   | 0   | 0   | 3.6        | 1.2       | 0%         | 0%         | 38%        | 62%        | 3.2          | 4.0          | 3rd         | Yes              |
| Negative past experience with psychotherapy/psychosocial intervention                                          | 33       | 1   | 4   | 17  | 7   | 3   | 1   | 0   | 0   | 0   | 3.3        | 1.0       | 0%         | 0%         | 33%        | 67%        | 3.0          | 3.6          | 3rd         | Yes              |
| Limited insight into disorder                                                                                  | 34       | 5   | 8   | 10  | 8   | 2   | 1   | 0   | 0   | 0   | 2.9        | 1.3       | 0%         | 0%         | 32%        | 68%        | 2.5          | 3.3          | 3rd         | Yes              |
